# Supplementary material
Source: ML conference proceedings conference paper supplement (https://openreview.net/forum?id=ks6Gg8nd0y)
Supplement: supplementary_material [file attachment]

# APPENDIX OF EXPLORING CROSS-MODAL FLOWS FOR FEW-SHOT LEARNING

**Anonymous authors**

Paper under double-blind review

## A THEORETICAL GUARANTEE OF FMA

**Proposition 1** (Identity). *Consider an intermediate feature  $x_t$ , where  $t \in [0, 1]$ , and  $z_c \in p_1$  is its corresponding text feature. Then the marginal velocity field is identical to the condition velocity field of  $x_t$ :*

$$v_t(x_t) = v_t(x_t|z_c) \quad (1)$$

*Proof.* As we have discussed in the Coupling Enhancement strategy, the conditional probability  $p_t(x_t|z)$  only assigns probability mass to features with the same label. This implies that, if  $x_t$  and  $z_c$  belong to the same category, then for all  $z' \notin z_c$ , we have  $p_t(x_t|z') = 0$ . Then we have:

$$\begin{aligned} v_t(x_t) &= \int v_t(x_t|z) \frac{p_t(x_t|z)p_1(z)}{p_t(x_t)} dz \\ &= v_t(x_t|z_c) \frac{p_t(x_t|z_c)p_1(z_c)}{p_t(x_t)} + \int_{z \neq z_c} v_t(x_t|z) \frac{p_t(x_t|z)p_1(z)}{p_t(x_t)} dz \\ &= v_t(x_t|z_c) \frac{p_t(x_t|z_c)p_1(z_c)}{p_t(x_t)} + \int_{z \neq z_c} v_t(x_t|z) \frac{0 \cdot p_1(z)}{p_t(x_t)} dz \\ &= v_t(x_t|z_c) \frac{p_t(x_t|z_c)p_1(z_c)}{p_t(x_t)} \\ &= v_t(x_t|z_c) \frac{p_t(x_t|z_c)p_1(z_c)}{\int p_t(x_t|z)p_t(z) dz} \\ &= v_t(x_t|z_c) \frac{p_t(x_t|z_c)p_1(z_c)}{p_t(x_t|z_c)p_t(z_c) + \int_{z \neq z_c} p_t(x_t|z)p_t(z) dz} \\ &= v_t(x_t|z_c) \frac{p_t(x_t|z_c)p_1(z_c)}{p_t(x_t|z_c)p_1(z_c) + \int_{z \neq z_c} 0 \cdot p_t(z) dz} \\ &= v_t(x_t|z_c) \frac{p_t(x_t|z_c)p_1(z_c)}{p_t(x_t|z_c)p_1(z_c)} \\ &= v_t(x_t|z_c) \end{aligned}$$

**Proposition 2** (Classification). *Given any text embedding  $z_c \in p_1$ , if a conditional velocity field  $v_t(x_t|z_c)$  is defined to generate  $p_t(x_t|z_c)$ , namely:*

$$x_0 \sim p_0, \quad \frac{dx_t}{dt} = v_t(x_t|z_c), \quad \Rightarrow x_t \sim p_t(x_t|z_c), \quad t \in (0, 1] \quad (2)$$

*Then the marginal velocity  $v_t(x_t)$ , defined by:*

$$v_t(x_t) = \int v_t(x_t|z) \frac{p_t(x_t|z)p_1(z)}{p_t(x_t)} dz \quad (3)$$

*can guarantee:*

$$x_1 = z_c \quad (4)$$

*where  $x_1$  is estimated by:  $dx_t = v_t(x_t)dt$*

054 *Proof.*

055 Consider the two transformation ODE using the marginal/conditional velocity:

$$056 \quad x_0 \sim p_0, \quad \frac{dx_t}{dt} = v_t(x_t|z_c), \quad \Rightarrow x_t \sim p_t(x_t|z_c), \quad t \in (0, 1] \quad (5)$$

$$057 \quad x_0 \sim p_0, \quad \frac{dx_t}{dt} = v_t(x_t) \quad \Rightarrow x_t \sim p_t(x_t), \quad t \in (0, 1] \quad (6)$$

058 Given the same initial image feature  $x_0$ , because  $v_t(x_t) = v_t(x_t|z_c)$ , these two ODEs are essentially  
059 the same one. By the Picard-Lindelöf theorem (assuming  $v_t(x_t)$  and  $v_t(x_t|z_c)$  is Lipschitz continuous,  
060 which is standard in flow modeling), the solution to an ODE with a given initial condition is unique.  
061 Therefore,  $x_1$  obtained by  $v_t(x_t)$  also have:

$$062 \quad x_1 \sim p_1(x_1|z_c) = \mathcal{N}(1 \cdot z_c + 0 \cdot x_0, 0) = z_c$$

063 By now, we have proved that the marginal velocity  $v_t(x_t)$  can not only convert an image feature  $x_0$   
064 into a text feature  $z \in p_1$ , but also guarantee that this text feature is exactly of the same class as  $x_0$ ,  
065 that is:  $z = z_c$ .

066 After that, we need to figure out how to learn  $v_t(x_t)$  using a neural network  $v_t^\theta(x_t)$ . Intuitively, we  
067 can optimize it by solving a least square regression problem between  $v_t(x_t)$  and  $u_t^\theta(x_t)$ :

$$068 \quad \mathcal{L}_{FM}(\theta) = \mathbb{E}_{x_t \sim p_t, t \sim [0,1]} [\|u_t^\theta(x_t) - v_t(x_t)\|^2], \quad (7)$$

069 Because  $v_t(x_t) = v_t(x_t|z)$ , and  $p_t(x_t|z) = \mathcal{N}(t \cdot z + (1-t) \cdot x_0, 0)$ , we have  $x_t = t \cdot z + (1-t) \cdot x_0$ ,  
070 then :

$$071 \quad v_t(x_t) = v_t(x_t|z) = \frac{dx_t}{dt} = \frac{d(t \cdot z + (1-t) \cdot x_0)}{dt} = z - x_0$$

072 Therefore, the training objective becomes:

$$073 \quad \mathcal{L}_{FM}(\theta) = \mathbb{E}_{z \sim p_1, x_0 \sim p_0(x_0|z), t \sim [0,1]} [\|u_t^\theta(x_t) - (z - x_0)\|^2] \quad (8)$$

## 074 B ALGORITHM

075 Below is the training and inference algorithm of our FMA, respectively.

---

### 076 Algorithm 1 Training

- 077 1: **Input:** paired image features and text features
  - 078  $\mathcal{D} = \{(x_0^i, z_c^i)\}_{i=0}^{N \times K}$
  - 079 2: **repeat**
  - 080 3:  $t \sim \mathcal{U}([0, 1]), (x_0, z_c) \sim \mathcal{D}$
  - 081 4:  $x_t = (1-t)x_0 + tz_c$
  - 082 5:  $\hat{x}_t \sim \mathcal{N}(\hat{x}_t|x_t, t \cdot (1-t) \cdot \sigma^2(x_t))$
  - 083 6: Take gradient descent on  $u_t^\theta(\hat{x}_t)$
  - 084 7: **until** converges
- 

---

### 076 Algorithm 2 Inference

- 077 1: **Input:** image features  $x_0$ , trained  $u_t^\theta(x_t)$ ,
  - 078 steps  $M$ , stepsize  $h$
  - 079 2:  $t = 0$
  - 080 3: **for**  $n = 1$  to  $M$  **do**
  - 081 4:  $x_{t+h} = x_t + h \cdot u_t^\theta(x_t)$
  - 082 5:  $t = t + h$
  - 083 6: **end for**
  - 084 7: **return**  $x_{h \cdot M}$  as new image feature
- 

## 085 C MODEL AGNOSTIC EXPERIMENT.

086 This section provides more detail of Table ??: standard deviation(Table B), statistical signifi-  
087 cance(Table B), and corresponding inference steps(Table B).

Table 1: **Details on standard deviations on Table ??.** The bottom right grey number next to each FMA’s result is the corresponding standard deviation.

| Method           | Difficult |          |          |          |          |          | Easy     |          |          |          |          |          |          |
|------------------|-----------|----------|----------|----------|----------|----------|----------|----------|----------|----------|----------|----------|----------|
|                  | Aircraft  | SAT      | DTD      | SUN      | UCF      | Avg      | Cars     | Net      | Flowers  | Food     | Pets     | Caltech  | Avg      |
| CLIP (?)         | 24.8      | 47.8     | 43.8     | 62.5     | 66.7     | 49.1     | 65.5     | 66.7     | 67.4     | 85.3     | 89.1     | 92.9     | 77.8     |
| +FMA             | 46.4±1.1  | 87.9±1.4 | 72.0±0.3 | 73.3±0.8 | 83.1±1.0 | 72.5±1.4 | 82.9±0.8 | 71.0±0.5 | 98.5±2.1 | 87.0±0.2 | 92.7±0.3 | 95.8±0.2 | 88.0±0.4 |
| CoOp (?)         | 43.2      | 86.0     | 70.0     | 74.9     | 83.1     | 71.4     | 83.1     | 71.4     | 97.2     | 84.4     | 91.1     | 95.5     | 87.1     |
| +FMA             | 47.6±0.7  | 88.1±0.3 | 73.1±0.6 | 75.9±0.2 | 84.4±0.2 | 73.8±0.4 | 85.4±0.3 | 72.5±0.2 | 98.2±0.0 | 85.0±0.1 | 91.4±0.3 | 95.7±0.1 | 88.0±0.2 |
| CoCoOp (?)       | 33.8      | 75.5     | 65.8     | 72.8     | 76.0     | 64.8     | 72.4     | 71.1     | 87.1     | 87.4     | 93.2     | 95.2     | 84.4     |
| +FMA             | 36.9±0.6  | 86.9±1.1 | 71.9±0.8 | 73.4±0.8 | 80.3±1.3 | 69.9±0.9 | 73.5±0.4 | 71.9±0.1 | 94.5±0.5 | 87.8±0.2 | 93.4±0.2 | 95.6±0.2 | 86.1±0.4 |
| CLIP-Adapter (?) | 33.8      | 70.4     | 59.3     | 74.3     | 80.1     | 63.6     | 74.2     | 71.6     | 93.6     | 87.1     | 92.4     | 94.9     | 85.6     |
| +FMA             | 35.8±0.3  | 85.6±1.2 | 69.2±0.1 | 74.4±0.1 | 81.5±0.3 | 69.3±0.7 | 74.7±0.1 | 71.3±0.2 | 95.6±0.4 | 87.2±0.2 | 92.9±0.0 | 96.0±0.3 | 86.3±0.2 |
| CLIP-LoRA (?)    | 54.7      | 90.7     | 73.0     | 76.0     | 86.2     | 76.1     | 86.0     | 73.4     | 97.9     | 84.2     | 91.6     | 96.1     | 88.2     |
| +FMA             | 57.8±0.7  | 91.0±0.0 | 75.4±0.5 | 77.2±0.2 | 87.1±0.1 | 77.7±0.3 | 87.7±0.3 | 73.5±0.1 | 99.1±0.4 | 85.1±0.2 | 91.6±0.1 | 96.5±0.1 | 88.9±0.2 |

Table 2: **Details on p-value on Table ??.** The baseline indicates which method we implement for FMA.

| Baseline         | Difficult |       |       |       |       |       | Easy  |       |         |       |       |         |       |
|------------------|-----------|-------|-------|-------|-------|-------|-------|-------|---------|-------|-------|---------|-------|
|                  | Aircraft  | SAT   | DTD   | SUN   | UCF   | Avg   | Cars  | Net   | Flowers | Food  | Pets  | Caltech | Avg   |
| CLIP (?)         | 0.000     | 0.000 | 0.000 | 0.000 | 0.000 | 0.000 | 0.001 | 0.000 | 0.000   | 0.001 | 0.000 | 0.000   | 0.000 |
| CoOp (?)         | 0.008     | 0.006 | 0.015 | 0.142 | 0.032 | 0.004 | 0.021 | 0.185 | 0.009   | 0.254 | 0.347 | 0.289   | 0.035 |
| CoCoOp (?)       | 0.048     | 0.000 | 0.002 | 0.375 | 0.001 | 0.001 | 0.210 | 0.245 | 0.000   | 0.322 | 0.415 | 0.076   | 0.008 |
| CLIP-Adapter (?) | 0.065     | 0.000 | 0.000 | 0.835 | 0.028 | 0.000 | 0.475 | 0.612 | 0.003   | 0.802 | 0.124 | 0.004   | 0.045 |
| CLIP-LoRA (?)    | 0.008     | 0.374 | 0.024 | 0.046 | 0.034 | 0.012 | 0.018 | 0.876 | 0.001   | 0.095 | 0.871 | 0.089   | 0.041 |

Table 3: **Details on inference steps (M) for different baselines corresponding to the results in Table ??.** The average steps are rounded to one decimal place.

| Baseline     | FGVC | EuroSAT | DTD | SUN | UCF | Cars | Net | Flow | Food | Pets | Cal | Avg |
|--------------|------|---------|-----|-----|-----|------|-----|------|------|------|-----|-----|
| CLIP         | 7    | 6       | 5   | 3   | 4   | 6    | 1   | 5    | 1    | 1    | 2   | 3.7 |
| CoOp         | 2    | 2       | 2   | 3   | 4   | 1    | 1   | 1    | 1    | 1    | 1   | 1.7 |
| CoCoOp       | 7    | 2       | 6   | 6   | 9   | 4    | 2   | 3    | 2    | 3    | 3   | 4.3 |
| CLIP-Adapter | 3    | 7       | 5   | 3   | 2   | 2    | 1   | 5    | 1    | 2    | 3   | 3.1 |
| CLIP-LoRA    | 3    | 5       | 2   | 3   | 2   | 3    | 2   | 6    | 2    | 1    | 2   | 2.8 |

## D MORE ABLATION STUDY.

**Adaptive inference strategy.** We implemented an adaptive strategy based on the logit margin. During the inference flow process at timestep  $t$ , we calculate the logits  $L_t$ . The inference is terminated early if the margin between the top-1 and top-2 class predictions exceeds a pre-defined threshold  $\epsilon$ :

$$Top1(L_t) - Top2(L_t) > \epsilon$$

We evaluated this strategy on the "Difficult" dataset group using the ViT-B/16 backbone under the 16-shot setting. We tested three different threshold values:  $\epsilon \in \{0.001, 0.0007, 0.0005\}$ . See Table B.

**Noise Augmentation Strategy.** The noise is injected as  $x_t \sim \mathcal{N}(x_t, \Sigma_t)$ , where  $\Sigma_t = k \cdot s(t)$ . For Schedule  $s(t)$ : We adopted the symmetric schedule  $s(t) = t(1 - t)$ , inspired by the Diffusion Schrodinger Bridge. See Table B.

**Different ODE Solvers.** To investigate whether higher-order solvers (which offer lower truncation errors for curved trajectories) provide better alignment accuracy than the basic Euler method, we evaluated three common numerical solvers under the same budget of inference steps ( $M$ ): Euler Method, Heun’s Method, and Runge-Kutta (RK4). See Table B.

Table 4: **Ablation study on adaptive inference strategies.** We compare our proposed Early Stopping Solver (ESS) with fixed steps against an adaptive strategy based on logit margin thresholds ( $\epsilon$ ). The best results are highlighted in bold.

| Method                                  | Aircraft    | SAT         | DTD         | SUN         | UCF         | Avg         |
|-----------------------------------------|-------------|-------------|-------------|-------------|-------------|-------------|
| CLIP (Zero-shot)                        | 24.8        | 47.8        | 43.8        | 62.5        | 66.7        | 49.1        |
| <b>ESS (Ours, Fixed <math>M</math>)</b> | <b>46.4</b> | <b>87.9</b> | <b>72.0</b> | <b>73.3</b> | <b>83.1</b> | <b>72.5</b> |
| Adaptive ( $\epsilon = 0.0010$ )        | 42.1        | 86.9        | <b>72.0</b> | 71.9        | <b>83.1</b> | 71.2        |
| Adaptive ( $\epsilon = 0.0007$ )        | 46.0        | 86.1        | 71.3        | 72.4        | 82.7        | 71.7        |
| Adaptive ( $\epsilon = 0.0005$ )        | <b>46.4</b> | <b>87.9</b> | 70.2        | <b>73.3</b> | 81.5        | 71.8        |

Table 5: **Ablation study on noise magnitude.** We evaluate the impact of different noise scaling factors  $k$  in the noise augmentation term  $\hat{x}_t \sim \mathcal{N}(x_t, k \cdot t(1-t))$ .

| Method                                      | Aircraft    | SAT         | DTD         | SUN         | UCF         | Avg         |
|---------------------------------------------|-------------|-------------|-------------|-------------|-------------|-------------|
| CLIP (Zero-shot)                            | 24.8        | 47.8        | 43.8        | 62.5        | 66.7        | 49.1        |
| <b>FMA (<math>k = \sigma^2(x_t)</math>)</b> | <b>46.4</b> | <b>87.9</b> | <b>72.0</b> | 73.3        | <b>83.1</b> | <b>72.5</b> |
| FMA ( $k = 2\sigma^2(x_t)$ )                | 45.8        | 87.2        | 71.1        | <b>83.2</b> | 71.2        | 71.7        |
| FMA ( $k = 5\sigma^2(x_t)$ )                | 43.6        | 83.8        | 69.1        | 79.5        | 68.8        | 69.0        |
| FMA ( $k = 1$ )                             | 37.9        | 78.1        | 64.2        | 74.2        | 54.1        | 61.7        |

Table 6: **Ablation study on ODE solvers during inference.** We compare the standard Euler method (1st order) against higher-order solvers (Heun, RK4).

| Method             | Aircraft    | SAT         | DTD         | SUN         | UCF         | Avg         |
|--------------------|-------------|-------------|-------------|-------------|-------------|-------------|
| CLIP (Zero-shot)   | 24.8        | 47.8        | 43.8        | 62.5        | 66.7        | 49.1        |
| <b>FMA (Euler)</b> | <b>46.4</b> | <b>87.9</b> | <b>72.0</b> | 73.3        | <b>83.1</b> | <b>72.5</b> |
| FMA (Heun)         | <b>46.4</b> | 87.7        | 71.8        | <b>73.4</b> | <b>83.1</b> | <b>72.5</b> |
| FMA (RK4)          | <b>46.4</b> | 87.7        | 71.9        | 73.3        | <b>83.1</b> | <b>72.5</b> |

## E GENERALIZATION EXPERIMENT.

This section provides the detail of Table ?? . For each dataset, we report its generalization performance on five baselines and FMA in Table B.

Table 7: **Cross-dataset transfer evaluation.** We train models on ImageNet (Source) and evaluate their generalization ability on 10 other unseen datasets (Target).

| Method  | Source   | Target Datasets |         |      |      |      |      |      |      |      |      |
|---------|----------|-----------------|---------|------|------|------|------|------|------|------|------|
|         | ImageNet | FGVC            | EuroSAT | DTD  | SUN  | UCF  | Cars | Flow | Food | Pets | Cal  |
| CoOp    | 71.4     | 16.2            | 49.3    | 35.7 | 58.0 | 60.9 | 63.2 | 59.7 | 80.8 | 86.9 | 91.1 |
| +FMA    | 72.4     | 16.1            | 49.8    | 36.5 | 57.6 | 61.6 | 62.4 | 58.7 | 80.2 | 86.5 | 91.5 |
| Adapter | 71.6     | 23.2            | 44.0    | 42.6 | 63.6 | 64.4 | 61.9 | 68.9 | 84.2 | 86.8 | 94.9 |
| +FMA    | 71.3     | 23.0            | 45.1    | 45.4 | 63.9 | 64.2 | 61.1 | 68.7 | 83.3 | 88.2 | 95.9 |
| CLIP    | 66.7     | 24.8            | 48.3    | 44.1 | 62.6 | 67.5 | 65.5 | 70.7 | 85.9 | 89.0 | 93.3 |
| +FMA    | 71.0     | 24.0            | 49.1    | 46.6 | 63.1 | 66.8 | 64.2 | 68.9 | 85.2 | 88.5 | 95.7 |
| LoRA    | 73.4     | 22.5            | 32.5    | 44.2 | 66.5 | 66.0 | 63.2 | 70.0 | 84.5 | 89.1 | 92.9 |
| +FMA    | 73.5     | 22.6            | 37.4    | 44.4 | 66.3 | 67.3 | 63.0 | 69.3 | 83.6 | 89.1 | 93.6 |
| CoCoOp  | 71.1     | 23.7            | 45.7    | 46.0 | 66.5 | 69.4 | 65.8 | 70.2 | 86.0 | 90.3 | 94.8 |
| +FMA    | 71.9     | 24.3            | 49.5    | 47.3 | 66.9 | 70.0 | 65.0 | 70.0 | 85.2 | 90.5 | 95.5 |

## F COMPUTATIONAL COST.

We conducted a comprehensive comparison of computational costs between FMA and five baseline methods. For a fair comparison, we fixed the training/test batch size at 32 and measured the average training time per iteration and peak memory usage on a single NVIDIA RTX 3090 GPU. See Table B.

Table 8: Comparison of computational cost (Training Time, Memory, and Inference Latency).

| Method       | Training Time | Training Memory | Inference Time/CLIP Inference Time |
|--------------|---------------|-----------------|------------------------------------|
| CLIP         | -             | -               | 1 (10.2ms)                         |
| CoOp         | 712ms         | 2770MB          | 1.2                                |
| CoCoOp       | 1912ms        | 12318MB         | 3.2                                |
| CLIP-Adapter | 157ms         | 1376MB          | 1.0                                |
| CLIP-LoRA    | 331ms         | 5406MB          | 1.3                                |
| FMA          | 198ms         | 2842MB          | 1.2 ( $M=1$ )                      |
